# Supplementary material for: Fluorescence microscopy coupled to electrochemistry: a powerful tool for the controlled electrochemical switch of fluorescent molecules
Source: Royal Society of Chemistry journal article supplement (doi:10.1039/b718899d), 2008-01-01

## Suppl. Mat 1

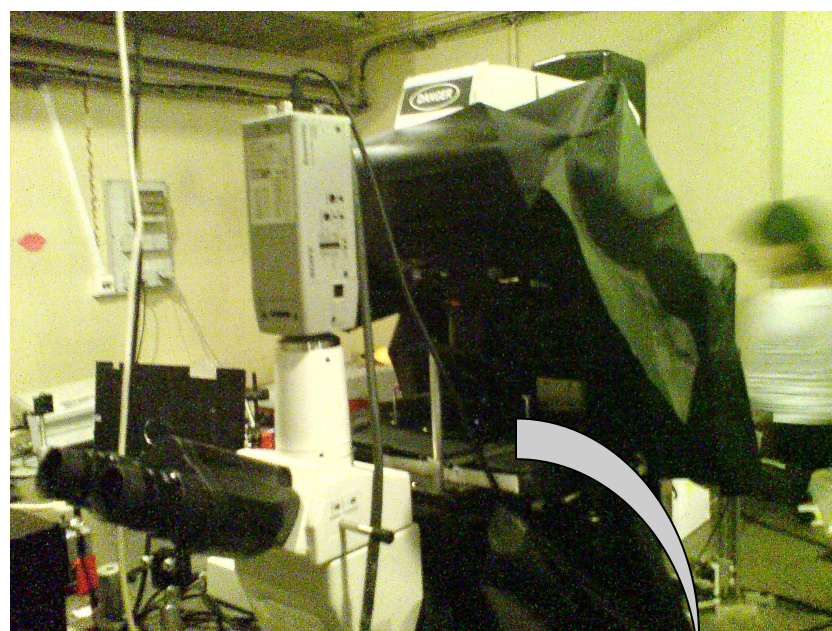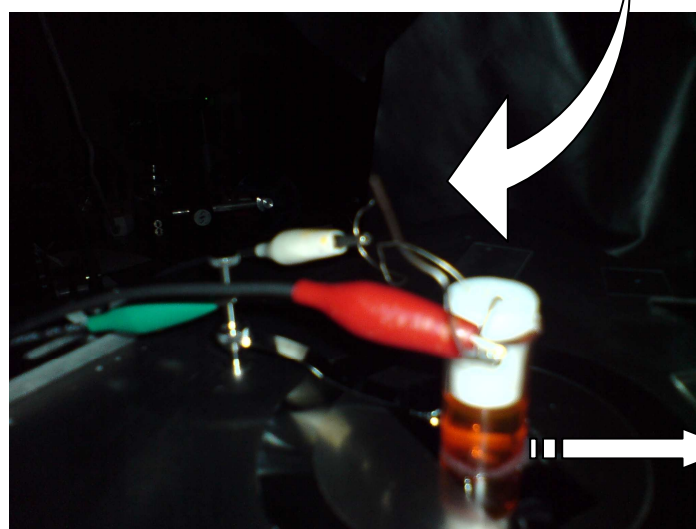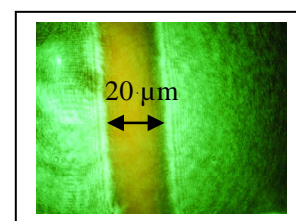

Pictures of the epifluorescence microscope set-up (top) and electrochemical cell (down). Inset shows the picture of the slot within the platinum layer (green part – laser light diffusion) through which the fluorescence of the tetrazine solution ( $\lambda_{em} = 567$  nm in dichloromethane) is observed (orange part). Fluorescence is collected for all wavelengths  $> 515$  nm).

## Supplementary mat. 2

Fluorescence intensity recorded upon a double potential step from 0 to -0.2 V and reverse during 25 s each. No appreciable variation is shown when the potential step does not induce the reduction of chloromethoxytetrazine.

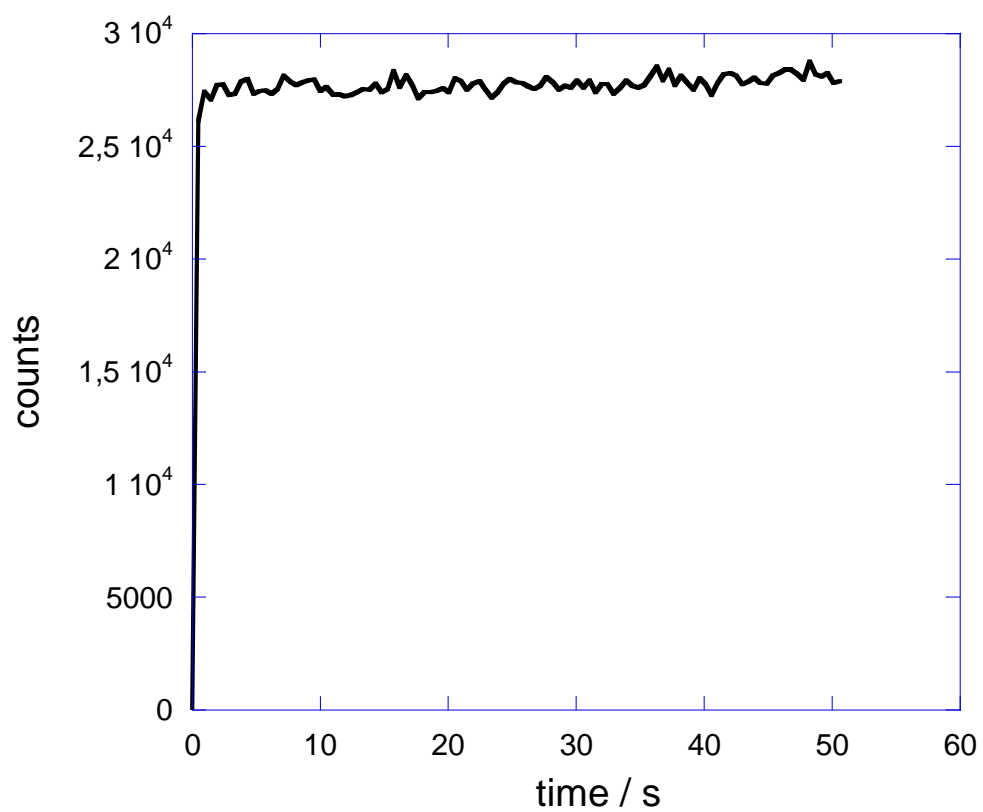

Supplement: b718899d.pdf [file b718899d.pdf]
